# Supplementary material for: Nine members of a family of nine-membered cyclic coordination clusters; Fe6Ln3 wheels (Ln = Gd to Lu and Y)
Source: Royal Society of Chemistry journal article supplement (doi:10.1039/c5cc08887a), 2015-11-13

Supporting Information for

## Nine members of a family nine-membered cyclic coordination clusters; Fe<sub>6</sub>Ln<sub>3</sub> wheels (Ln = Gd to Lu and Y)

Irina A. Kühne <sup>a</sup>, Valeriu Mereacre <sup>a</sup>, Christopher E. Anson <sup>a</sup> and Annie K. Powell <sup>\*a,b</sup>

<sup>a</sup>: Institut für Anorganische Chemie, Karlsruhe Institut für Technologie (KIT), Engesserstr. 15,

D-76131 Karlsruhe, Germany

Email: annie.powell@kit.edu

Tel: +49 721 608 2135; Fax: +49 721 608 8142

<sup>b</sup>: Institut für Nanotechnologie, Karlsruhe Institut für Technologie (KIT), Postfach 3640, D-76021 Karlsruhe, Germany.

### Table of Contents

**Fig. S1:** Structure of Fe<sub>6</sub>Dy<sub>3</sub> (**2**) with polyhedra around the metal center.

**Fig. S2:** Packing arrangement of **1** along *a*-axis (left) and *c*-axis (right).

**Scheme 1.** Coordination modes of the deprotonated vanox<sup>2-</sup> ligand, (left) and the benzoic acid (right).

**Fig. S3:** Temperature dependence of the  $\chi$  plot at 1000 Oe for complexes Fe<sub>6</sub>Y<sub>3</sub> (**8**) (blue triangles) and the  $1/\chi$  plot with logarithmic x-axis (inset) (left) and  $\chi T$  plot of Fe<sub>6</sub>Gd<sub>3</sub> (**9**) and the substituted  $\chi T$  plot (Fe<sub>6</sub>Gd<sub>3</sub> - Fe<sub>6</sub>Y<sub>3</sub>) on a logarithmic temperature scale (right).

**Fig. S4:** Field dependence of Magnetization for Fe<sub>6</sub>Dy<sub>3</sub> (**2**), Fe<sub>6</sub>Y<sub>3</sub> (**8**) and Fe<sub>6</sub>Gd<sub>3</sub> (**9**) at different temperatures; reduced magnetization (inset).

**Fig. S5:** In-phase (left) and out-of-phase susceptibility of Fe<sub>6</sub>Dy<sub>3</sub> (**2**) at varying field.

**Fig. S6:** in-phase (left) and out-of-phase susceptibility (right) of Fe<sub>6</sub>Dy<sub>3</sub> (**2**) under an applied field of 2000 Oe.

**Fig. S7:** Arrhenius fit Fe<sub>6</sub>Dy<sub>3</sub> (**2**).

**S2.** Crystallography, tables of crystal data, selected bond lengths and angles for **2**.

**S3.** Chemicals and Instrumentation.

**S4.** Synthesis and characterization of **1-9**.

**S5.** Crystal data.

**S6.** PHI report for Fe<sub>6</sub>Y<sub>3</sub> **8**.

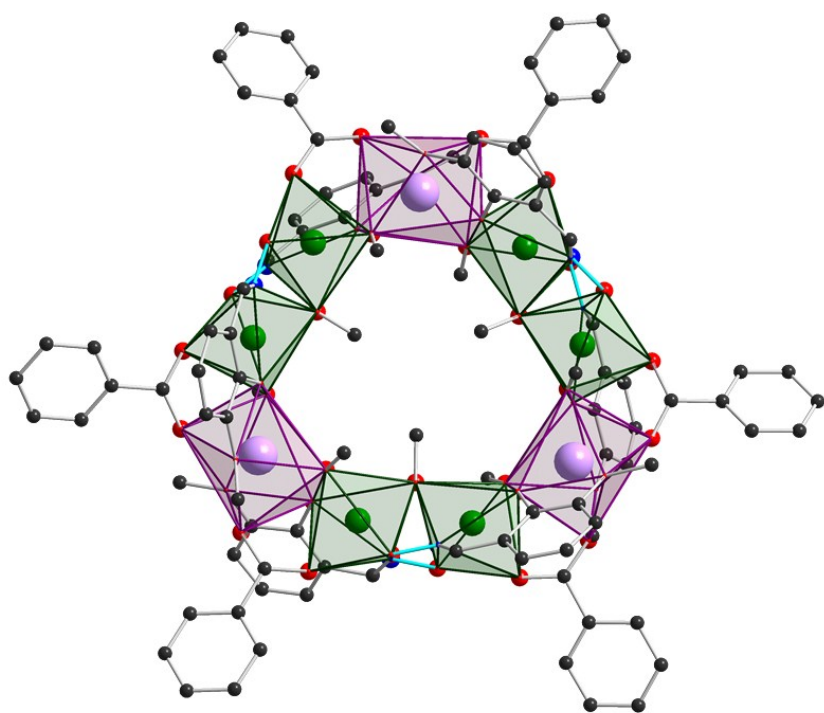

**Fig. S1:** Structure of  $\text{Fe}_6\text{Dy}_3$  (**2**) with polyhedra around the metal center to emphasize the distorted bicapped trigonal-prismatic geometry of the  $\text{Ln}^{\text{III}}$  and the distorted octahedral environment of the  $\text{Fe}^{\text{III}}$  ions.

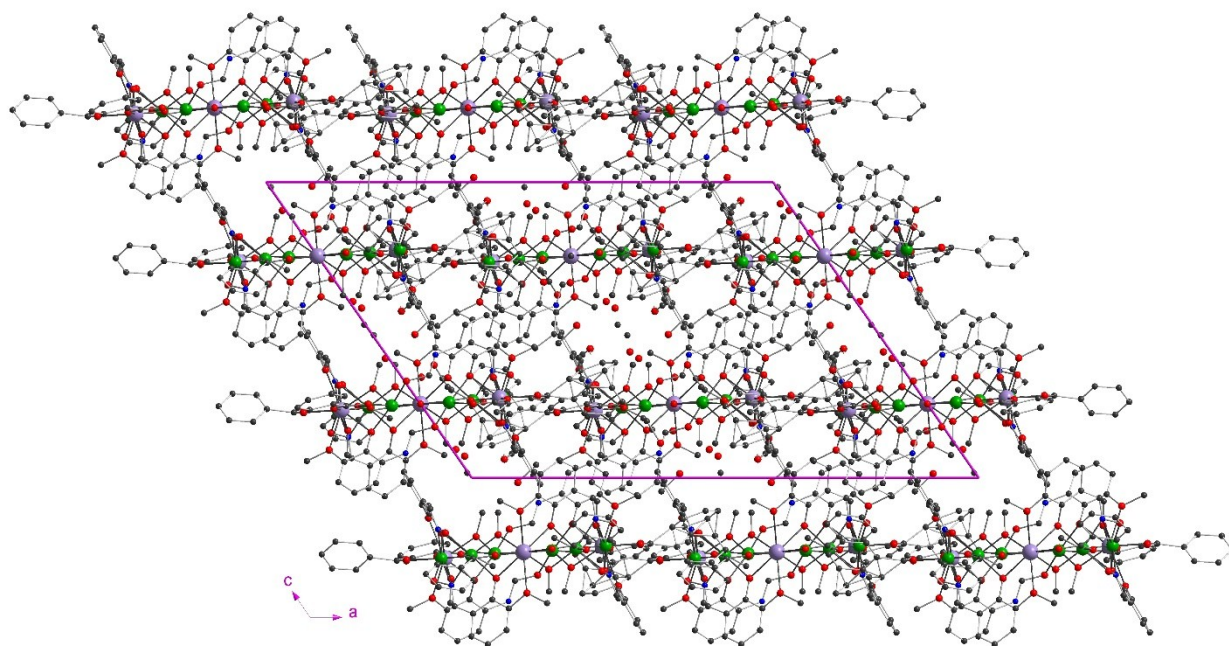

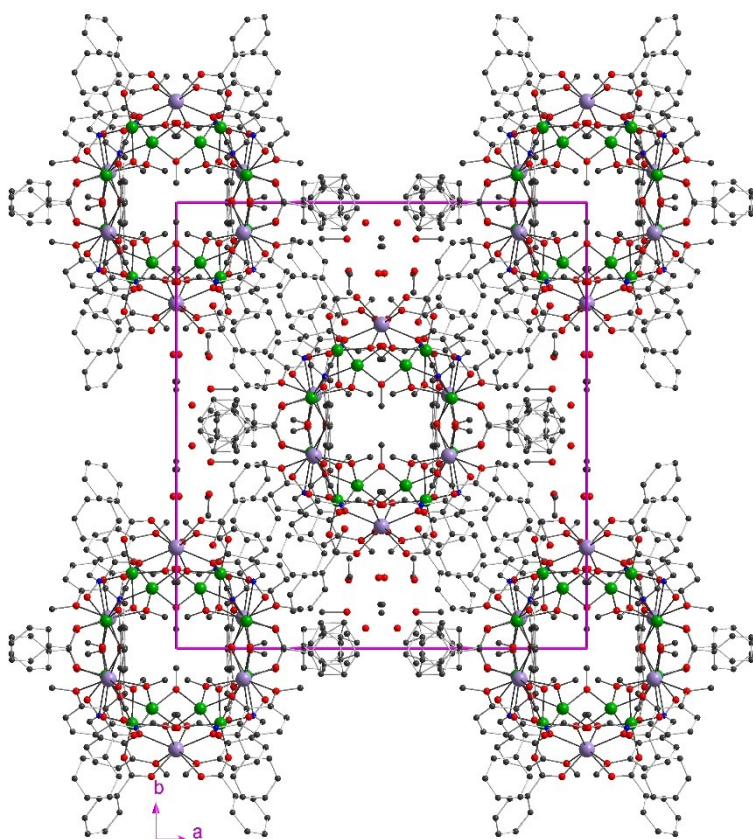

**Fig. S2:** Packing arrangement of **1** along *a*-axis (top) and *c*-axis (bottom).

**Scheme 1.** Coordination modes of the deprotonated vanox<sup>2-</sup> ligand, ( $\eta^1:\eta^2:\eta^1:\eta^1:\mu_3$ ) (left) and the benzoic acid ( $\eta^1:\eta^1:\mu_2$ ) (right).

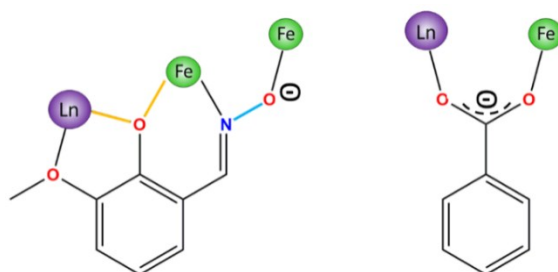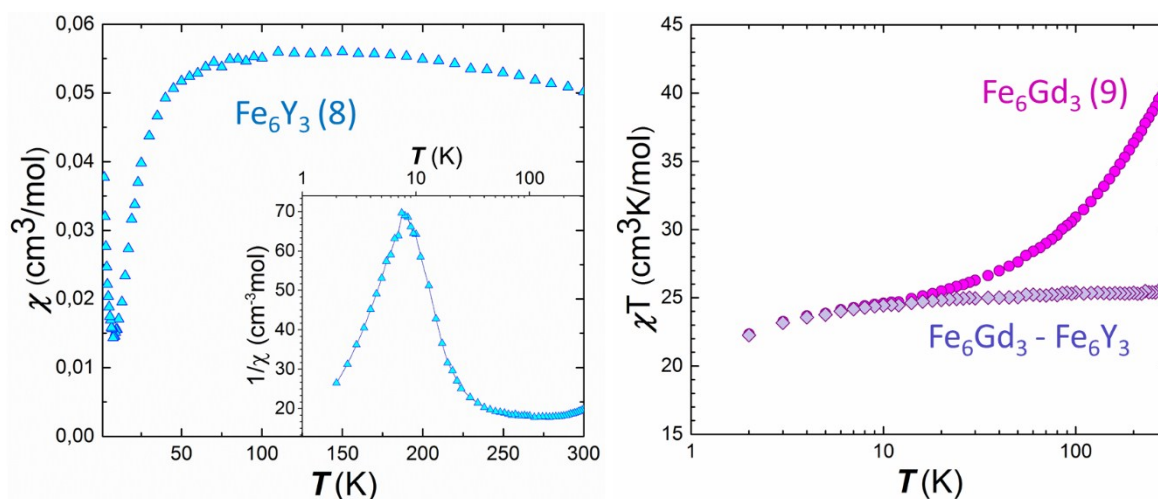

**Fig. S3:** Temperature dependence of the  $\chi$  plot at 1000 Oe for complexes  $\text{Fe}_6\text{Y}_3$  (**8**) (blue triangles) and the  $1/\chi$  plot with logarithmic x-axis (inset) (left) and  $\chi T$  plot of  $\text{Fe}_6\text{Gd}_3$  (**9**) and the substituted  $\chi T$  plot ( $\text{Fe}_6\text{Gd}_3 - \text{Fe}_6\text{Y}_3$ ) on a logarithmic temperature scale (right).

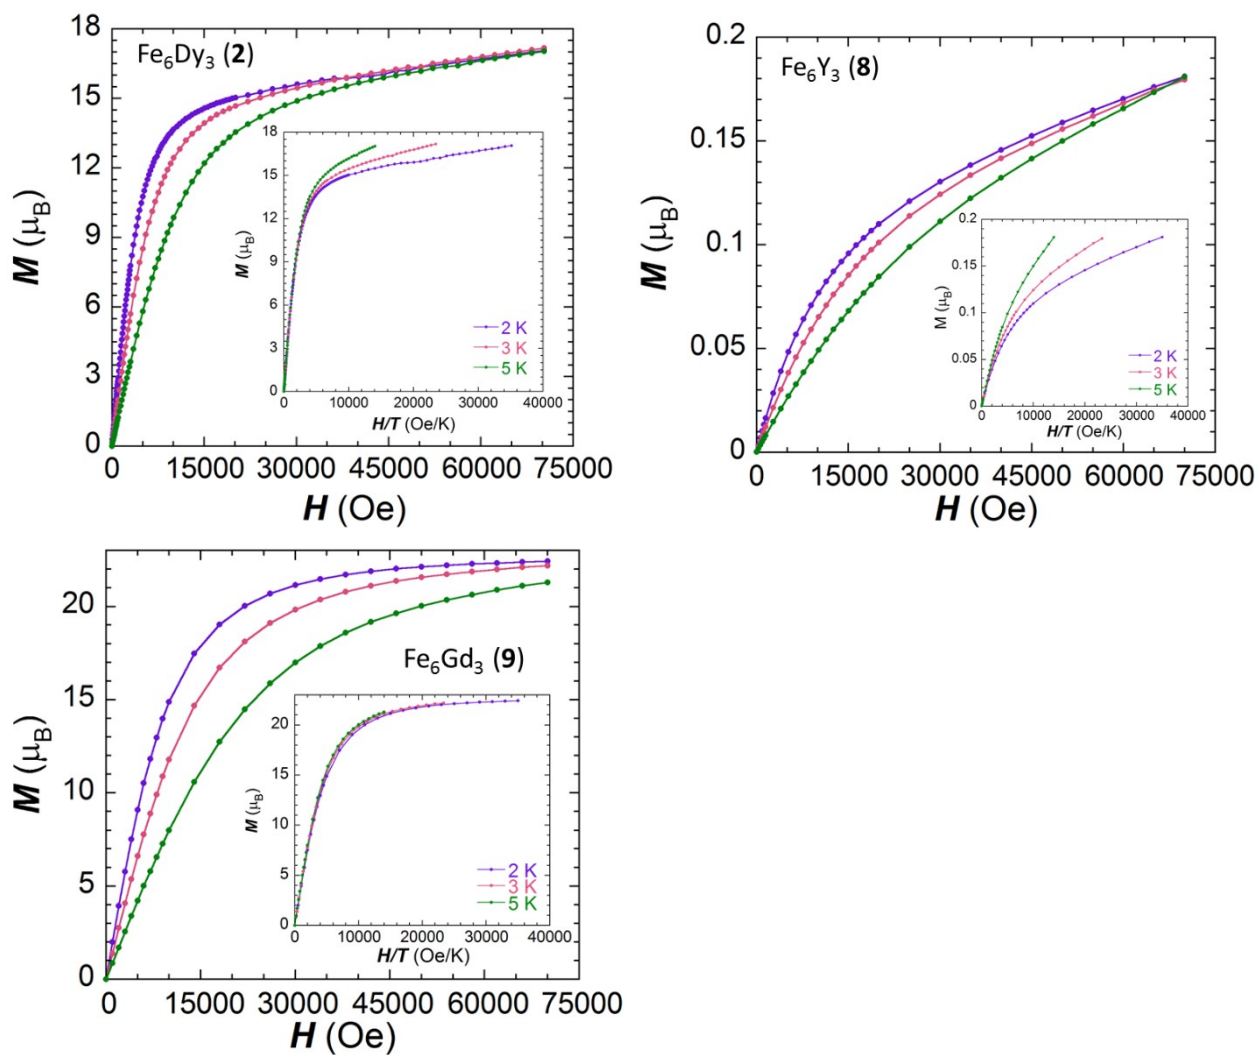

**Fig. S4:** Field dependence of Magnetization for  $\text{Fe}_6\text{Dy}_3$  (2) (left),  $\text{Fe}_6\text{Y}_3$  (8) (right) and  $\text{Fe}_6\text{Gd}_3$  (9) at different temperatures; reduced magnetization (inset).

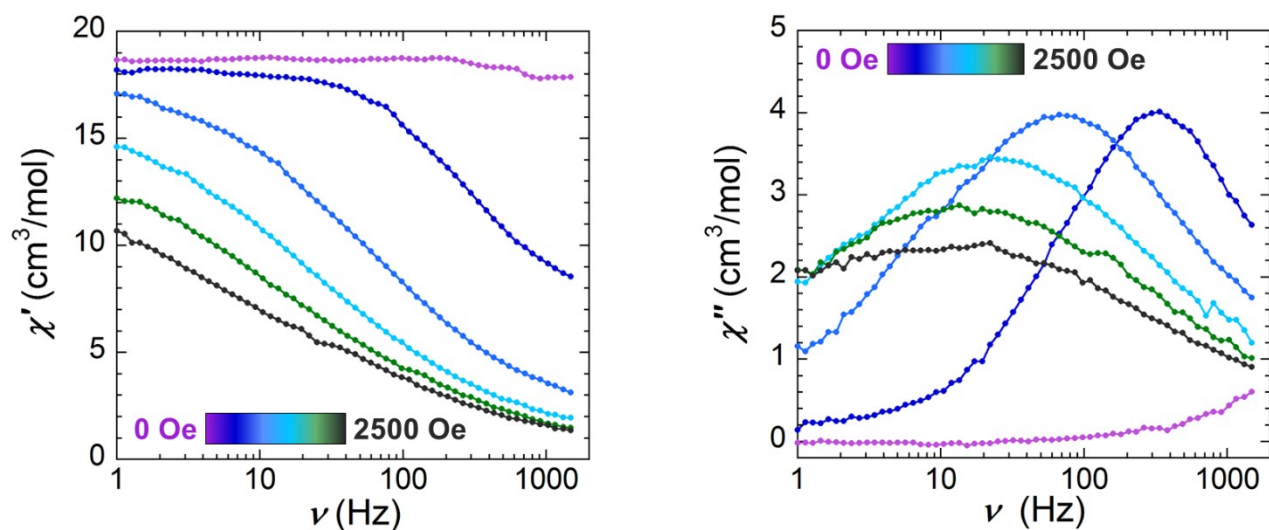

**Fig. S5:** In-phase (left) and out-of-phase susceptibility of  $\text{Fe}_6\text{Dy}_3$  (2) at varying field.

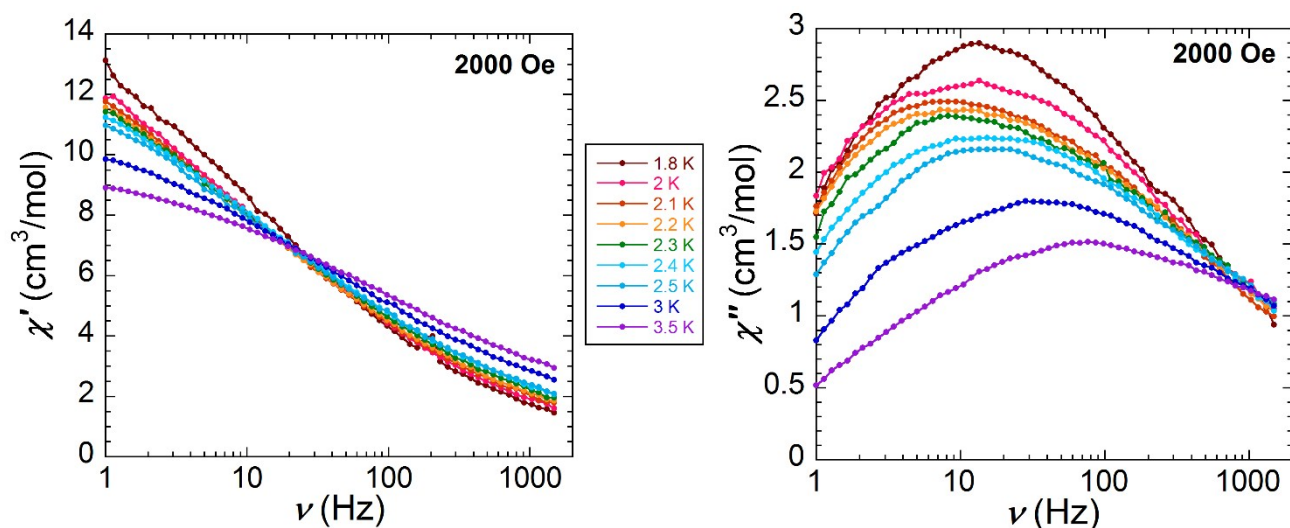

**Fig. S6:** In-phase (left) and out-of-phase susceptibility (right) of  $\text{Fe}_6\text{Dy}_3$  (**2**) under an applied field of 2000 Oe.

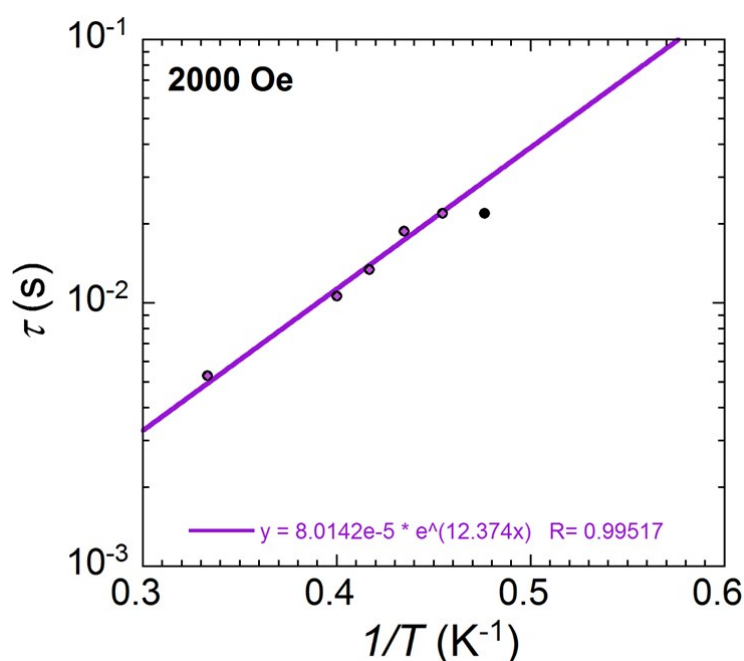

**Fig. S7:** Arrhenius fit for  $\text{Fe}_6\text{Dy}_3$  (**2**).

### S3. Chemicals and Instrumentation.

Commercially available reagents were used without further purification unless otherwise stated.

*o*-Vanillinoxime (Hvanox) was prepared according to the procedures described in the literature.<sup>1</sup>

A suspension of 3.31g (24.2 mmol) of *o*-vanillin in 11ml  $\text{H}_2\text{O}$  was stirred while heating to 45°C. A solution containing 1.80g (26.1 mmol)  $\text{NH}_2\text{OH}\cdot\text{HCl}$  and 1.78g (21.8 mmol)  $\text{CH}_3\text{CO}_2\text{Na}$  was added and the reaction was heated with stirring at 80°C for 2h. Upon cooling to room temperature the resulting white microcrystalline precipitate was filtered and washed with cold  $\text{H}_2\text{O}$  and recrystallized from EtOH. The resulting compound is light sensitive.

Elemental analysis (C, H and N) was performed by Vario EL (Elementar Analysen System GmbH) from Perkin Elmer. Fourier transform infrared spectra (FT-IR) were recorded as KBr pellets on a Perkin Elmer Spectrum GX in the range of 4000 to 400  $\text{cm}^{-1}$ .

Magnetic susceptibility measurements were obtained with a Quantum Design SQUID magnetometer MPMS-XL. The measurements were performed of a polycrystalline powder.

<sup>1</sup> I. J. Hewitt, Y. Lan, C. E. Anson, J. Luzon, R. Sessoli, and A. K. Powell, *Chem. Commun.*, 2009, **3**, 6765–7.

#### S4. Synthesis and characterization of **1-9**.

The syntheses have been optimised for the production of single crystals rather than bulk microcrystalline products.

**(1)**  $[\text{Fe}_6\text{Tb}_3(\mu\text{-OMe})_9(\text{vanox})_6(\text{benzoate})_6]\cdot 7\text{MeOH}\cdot 4\text{H}_2\text{O}$ : 0.066 g (0.4 mmol)  $\text{H}_2\text{vanox}$ , 0.054 g (1.0 mmol)  $\text{NaOMe}$  were solved in 10.0 ml  $\text{MeOH}$  and put to a solution of 0.040 g (0.2 mmol)  $\text{FeCl}_2\cdot 4\text{H}_2\text{O}$ , 0.114 g (0.25 mmol)  $\text{Tb}(\text{NO}_3)_3\cdot 6\text{H}_2\text{O}$  and 0.048 g (0.4 mmol) benzoic acid in 10.0 ml  $\text{MeOH}$ . The dark red almost black solution is stirred for 10 minutes at room temperature, and without any filtering left to stand for crystallisation. After one week complex **1** crystallises as dark red-black cubes suitable for single crystal X-ray analysis.

The use of  $\text{FeCl}_3\cdot 6\text{H}_2\text{O}$  instead of  $\text{FeCl}_2\cdot 4\text{H}_2\text{O}$  leads to microcrystalline precipitate in much lower yield.

Yield: 0.048 g (19.6% related to Tb)

Elemental analysis for  $\text{C}_{99}\text{H}_{113}\text{Fe}_6\text{Tb}_3\text{N}_6\text{O}_{46}$  (%): calculated: C: 40.51, H: 3.88; N: 2.86; found: C: 40.36; H: 4.01; N: 2.97.

IR (KBr):  $\tilde{\nu}/\text{cm}^{-1}$  = 3436 (m), 1598 (m), 1539 (s), 1492 (w), 1458 (m), 1438 (s), 1405 (s), 1268 (m), 1241 (m), 1220 (m), 1170 (w), 1095 (w), 1057 (s), 966 (m), 853 (m), 764 (w), 721 (m), 673 (m), 657 (m), 559 (w), 453 (m).

**(2)-(8)**: The complexes were synthesized in a similar fashion to complex **1**, but using the relevant lanthanide nitrate in place of  $\text{Tb}(\text{NO}_3)_3\cdot 6\text{H}_2\text{O}$ .

Yield  $[\text{Fe}_6\text{Dy}_3]$  (**2**): 0.037 g (15.1 % related to Dy)

Elemental analysis for  $\text{C}_{99}\text{H}_{113}\text{Fe}_6\text{Dy}_3\text{N}_6\text{O}_{46}$  (%): calculated: C: 40.36, H: 3.86; N: 2.85; found: C: 40.52; H: 3.61; N: 2.89.

IR (KBr):  $\tilde{\nu}/\text{cm}^{-1}$  = 3429 (m), 3060 (w), 2932 (m), 2851 (w), 2822 (w), 1740 (w), 1591 (m), 1541 (s), 1452 (s), 1399 (s), 1268 (m), 1236 (m), 1215 (m), 1172 (w), 1055 (s), 966 (m), 846 (w), 718 (m), 658 (w), 562 (w), 448 (m).

Yield  $[\text{Fe}_6\text{Ho}_3]$  (**3**): 0.044 g (17.8 % related to Ho)

Elemental analysis for  $\text{C}_{99}\text{H}_{115}\text{Fe}_6\text{Ho}_3\text{N}_6\text{O}_{47}$  (%): calculated: C: 40.02, H: 3.90; N: 2.82; found: C: 40.12; H: 3.83; N: 3.04.

IR (KBr):  $\tilde{\nu}/\text{cm}^{-1}$  = 3431 (m), 3064 (w), 1596 (m), 1541 (s), 1491 (w), 1455 (s), 1399 (s), 1268 (m), 1238 (m), 1217 (m), 1172 (w), 1096 (m), 1057 (s), 966 (m), 849 (w), 723 (m), 664 (w), 589 (w), 449 (m).

Yield  $[\text{Fe}_6\text{Er}_3]$  (**4**): 0.029 g (11.8 % related to Er)

Elemental analysis for  $\text{C}_{99}\text{H}_{109}\text{Fe}_6\text{Er}_3\text{N}_6\text{O}_{44}$  (%): calculated: C: 40.76, H: 3.76; N: 2.88; found: C: 40.58; H: 3.66; N: 2.84.

IR (KBr):  $\tilde{\nu}/\text{cm}^{-1}$  = 3439 (m), 1598 (s), 1540 (s), 1492 (w), 1459 (m), 1438 (w), 1407 (m), 1269 (m), 1242 (m), 1219 (w), 1173 (w), 1095 (m), 1059 (m), 965 (w), 855 (m), 766 (w), 725 (m), 687 (w), 675 (w), 643 (w), 452 (w).

Yield  $[\text{Fe}_6\text{Tm}_3]$  (**5**): 0.032 g (13.1 % related to Tm)

Elemental analysis for  $\text{C}_{99}\text{H}_{109}\text{Fe}_6\text{Tm}_3\text{N}_6\text{O}_{44}$  (%): calculated: C: 40.59, H: 3.75; N: 2.86; found: C: 40.44; H: 3.68; N: 2.62.

IR (KBr):  $\tilde{\nu}/\text{cm}^{-1}$  = 3444 (m), 1597 (s), 1539 (s), 1492 (w), 1458 (m), 1438 (w), 1406 (m), 1268 (m), 1241 (m), 1221 (w), 1170 (w), 1094 (m), 1058 (m), 967 (w), 856 (m), 763 (w), 722 (m), 680 (w), 674 (w), 626 (w), 456 (w).

Yield  $[\text{Fe}_6\text{Yb}_3]$  (**6**): 0.038 g (15.1 % related to Yb)

Elemental analysis for  $\text{C}_{102}\text{H}_{133}\text{Fe}_6\text{Yb}_3\text{N}_6\text{O}_{53}$  (%): calculated: C: 39.10, H: 4.27; N: 2.68; found: C: 39.32; H: 4.11; N: 2.56.

IR (KBr):  $\tilde{\nu}/\text{cm}^{-1}$  = 3455 (m), 2928 (w), 1598 (s), 1541 (s), 1491 (w), 1458 (m), 1437 (w), 1408 (m), 1268 (m), 1240 (m), 1221 (w), 1095 (m), 1059 (m), 968 (w), 858 (m), 762 (w), 724 (m), 689 (w), 672 (w), 631 (w), 457 (w).

Yield  $[\text{Fe}_6\text{Lu}_3]$  (**7**): 0.036 g (14.3 % related to Lu)

Elemental analysis for  $\text{C}_{99}\text{H}_{117}\text{Fe}_6\text{Lu}_3\text{N}_6\text{O}_{48}$  (%): calculated: C: 39.38, H: 3.90; N: 2.78; found: C: 39.15; H: 4.01; N: 2.82.

IR (KBr):  $\tilde{\nu}/\text{cm}^{-1}$  = 3450 (m), 2931 (w), 1597 (m), 1540 (m), 1493 (w), 1459 (m), 1438 (w), 1409 (m), 1269 (m), 1242 (m), 1221 (m), 1175 (w), 1095 (w), 1060 (m), 966 (m), 853 (m), 764 (m), 721 (m), 689 (w), 674 (m), 657 (m), 577 (w), 456 (m).

Yield [ $\text{Fe}_6\text{Y}_3$ ] (**8**): 0.073 g (39.4 % related to Y)

Elemental analysis for  $\text{C}_{99}\text{H}_{117}\text{Fe}_6\text{Y}_3\text{N}_6\text{O}_{48}$  (%): calculated: C: 43.07, H: 4.27; N: 3.04; found: C: 42.95; H: 4.19; N: 3.07.

IR (KBr):  $\tilde{\nu}/\text{cm}^{-1}$  = 3423 (m), 2911 (w), 1594 (s), 1536 (s), 1488 (w), 1457 (m), 1439 (w), 1409 (m), 1267 (m), 1242 (m), 1223 (m), 1176 (w), 1094 (w), 1062 (m), 967 (m), 854 (m), 765 (w), 720 (m), 674 (m), 643 (w), 436 (w).

(**9**) [ $\text{Fe}_6\text{Gd}_3(\mu\text{-OMe})_9(\text{vanox})_6(4\text{-Cl-benzoate})_6$ ] $\cdot 9\text{MeOH}$ : 0.066 g (0.4 mmol)  $\text{H}_2\text{vanox}$ , 0.081 g (1.5 mmol) NaOMe were solved in 10.0 ml MeOH and put to a solution of 0.040 g (0.2 mmol)  $\text{FeCl}_2\cdot 4\text{H}_2\text{O}$ , 0.114 g (0.25 mmol)  $\text{Gd}(\text{NO}_3)_3\cdot 6\text{H}_2\text{O}$  and 0.063 g (0.4 mmol) 4-Chlorobenzoic acid in 10.0 ml MeOH. The dark red almost black solution is stirred for 10 minutes at room temperature, and without any filtering left to stand for crytalysis. After 4 days complex **9** crystallizes as dark red-black cubes suitable for single crytsal X-ray analysis.

Yield (**9**): 0.025 g (10.7 % related to Gd)

Elemental analysis for  $\text{C}_{102}\text{H}_{123}\text{Fe}_6\text{Gd}_3\text{N}_6\text{O}_{48}\text{Cl}_6$  (%): calculated: C: 37.85, H: 3.83; N: 2.59; found: C: 37.78; H: 3.64; N: 2.44.

IR (KBr):  $\tilde{\nu}/\text{cm}^{-1}$  = 3439 (m), 1600 (s), 1541 (s), 1501 (w), 1459 (s), 1438 (m), 1444 (s), 1358 (w), 1270 (m), 1240 (w), 1221 (m), 1167 (m), 1094 (w), 1056 (m), 1010 (w), 966 (m), 855 (m), 779 (w), 735 (w), 683 (w), 608 (w), 564 (w), 502 (w), 461 (m).

## S5. Crystal data for **1-9**.

| Compound                                            | $\text{Fe}_6\text{Tb}_3$ <b>1</b>                                           | $\text{Fe}_6\text{Ho}_3$ <b>3</b>                                           | $\text{Fe}_6\text{Er}_3$ <b>4</b>    |
|-----------------------------------------------------|-----------------------------------------------------------------------------|-----------------------------------------------------------------------------|--------------------------------------|
| Empirical formula                                   | $\text{C}_{106}\text{H}_{135}\text{Fe}_6\text{N}_6\text{O}_{50}\text{Tb}_3$ | $\text{C}_{107}\text{H}_{135}\text{Fe}_6\text{Ho}_3\text{N}_6\text{O}_{49}$ |                                      |
| Formula weight                                      | 3105.05                                                                     | 3119.09                                                                     |                                      |
| Crystal system                                      | monoclinic                                                                  | monoclinic                                                                  |                                      |
| Space group                                         | $C2/c$                                                                      | $C2/c$                                                                      |                                      |
| Crystal size (nm)                                   | 0.280 x 0.090 x 0.070                                                       | 0.370 x 0.110 x 0.090                                                       |                                      |
| $a$ (Å)                                             | 29.189(3)                                                                   | 29.211(2)                                                                   |                                      |
| $b$ (Å)                                             | 26.117(3)                                                                   | 25.894(2)                                                                   |                                      |
| $c$ (Å)                                             | 20.479(2)                                                                   | 20.7929(16)                                                                 |                                      |
| $\alpha$ (°)                                        | 90                                                                          | 90                                                                          |                                      |
| $\beta$ (°)                                         | 124.572(2)                                                                  | 124.970(5)                                                                  |                                      |
| $\gamma$ (°)                                        | 90                                                                          | 90                                                                          |                                      |
| $V$ (Å <sup>3</sup> )                               | 12854(2)                                                                    | 12888.1(19)                                                                 |                                      |
| $Z$                                                 | 4                                                                           | 4                                                                           |                                      |
| $d_{\text{calc}}$ (g cm <sup>-3</sup> )             | 1.604                                                                       | 1.607                                                                       |                                      |
| $T$ (K)                                             | 100(2)                                                                      | 150(2)                                                                      |                                      |
| $\mu$ (mm <sup>-1</sup> )                           | 2.371                                                                       | 2.559                                                                       |                                      |
| $F(000)$                                            | 6256                                                                        | 6272                                                                        |                                      |
| Limiting indices                                    | $h = \pm 38, k = \pm 33, l = \pm 27$                                        | $h = \pm 36, k = \pm 32, l = \pm 26$                                        | $h = \pm 12, k = \pm 14, l = \pm 15$ |
| Reflections collected / unique                      | 30941 / 14288                                                               | 41101 / 13580                                                               | 4842 / 4842                          |
| $R(\text{int})$                                     | 0.00426                                                                     | 0.1006                                                                      |                                      |
| Completeness to $\Theta$ (%)                        | 99.7                                                                        | 99.4                                                                        | 88.8                                 |
| Data / restraints / parameters                      | 14288 / 32 / 770                                                            | 13580 / 25 / 703                                                            | 4440 / 0 / 291                       |
| GooF on $F^2$                                       | 1.035                                                                       | 1.009                                                                       | 1.016                                |
| Final $R$ indices [ $I > 2\sigma(I)$ ] <sup>a</sup> | $R_1 = 0.0476; wR_2 = 0.1259$                                               | $R_1 = 0.0661; wR_2 = 0.1604$                                               | $R_1 = 0.0715; wR_2 = 0.1572$        |
| $R$ indices (all data)                              | $R_1 = 0.0679; wR_2 = 0.1373$                                               | $R_1 = 0.0952; wR_2 = 0.1719$                                               | $R_1 = 0.1191; wR_2 = 0.1810$        |
| Largest diff. peak/hole (e Å <sup>-3</sup> )        | 2.875 / -1.523                                                              | 0.942 / -3.548                                                              | 1.294 / -1.437                       |
| CCDC no.                                            |                                                                             |                                                                             |                                      |

| Compound                                                                  | Fe <sub>6</sub> Tm <sub>3</sub> <b>5</b>                                                         | Fe <sub>6</sub> Yb <sub>3</sub> <b>6</b> | Fe <sub>6</sub> Lu <sub>3</sub> <b>7</b>                                                         |
|---------------------------------------------------------------------------|--------------------------------------------------------------------------------------------------|------------------------------------------|--------------------------------------------------------------------------------------------------|
| Empirical formula                                                         | C <sub>108</sub> H <sub>139</sub> Fe <sub>6</sub> N <sub>6</sub> O <sub>50</sub> Tm <sub>3</sub> |                                          | C <sub>108</sub> H <sub>139</sub> Fe <sub>6</sub> Lu <sub>3</sub> N <sub>6</sub> O <sub>50</sub> |
| Formula weight                                                            | 3163.14                                                                                          |                                          | 3181.25                                                                                          |
| Crystal system                                                            | monoclinic                                                                                       |                                          | monoclinic                                                                                       |
| Space group                                                               | <i>C2/c</i>                                                                                      |                                          | <i>C2/c</i>                                                                                      |
| Crystal size (nm)                                                         | 0.48 x 0.04 x. 0.03                                                                              |                                          | 0.42 x 0.07 x 0.04                                                                               |
| <i>a</i> (Å)                                                              | 29.069(4)                                                                                        |                                          | 29.1226(16)                                                                                      |
| <i>b</i> (Å)                                                              | 25.935(4)                                                                                        |                                          | 25.811(2)                                                                                        |
| <i>c</i> (Å)                                                              | 20.683(3)                                                                                        |                                          | 20.8572(12)                                                                                      |
| $\alpha$ (°)                                                              | 90                                                                                               |                                          | 90                                                                                               |
| $\beta$ (°)                                                               | 124.822(2)                                                                                       |                                          | 125.126(4)                                                                                       |
| $\gamma$ (°)                                                              | 90                                                                                               |                                          | 90                                                                                               |
| <i>V</i> (Å <sup>3</sup> )                                                | 12801(3)                                                                                         |                                          | 12823.0(15)                                                                                      |
| <i>Z</i>                                                                  | 4                                                                                                |                                          | 4                                                                                                |
| <i>d</i> <sub>calc</sub> (g cm <sup>-3</sup> )                            | 1.641                                                                                            |                                          | 1.648                                                                                            |
| <i>T</i> (K)                                                              | 100(2)                                                                                           |                                          | 150(2)                                                                                           |
| $\mu$ (mm <sup>-1</sup> )                                                 | 2.803                                                                                            |                                          | 3.032                                                                                            |
| <i>F</i> (000)                                                            | 6368                                                                                             |                                          | 6392                                                                                             |
| Limiting indices                                                          | <i>h</i> = ± 35, <i>k</i> = ± 32, <i>l</i> = ± 25                                                |                                          | <i>h</i> = ± 36, <i>k</i> = ± 32, <i>l</i> = ± 26                                                |
| Reflections collected / unique                                            | 29204 / 12537                                                                                    |                                          | 41722 / 13630                                                                                    |
| <i>R</i> (int)                                                            | 0.0707                                                                                           |                                          | 0.0869                                                                                           |
| Completeness to $\Theta$ (%)                                              |                                                                                                  |                                          | 99.9                                                                                             |
| Data / restraints / parameters                                            | 12537 / 29 / 747                                                                                 |                                          | 13630 / 49 / 698                                                                                 |
| GooF on <i>F</i> <sup>2</sup>                                             | 1.036                                                                                            |                                          | 1.047                                                                                            |
| Final <i>R</i> indices [ <i>I</i> > 2 $\sigma$ ( <i>I</i> )] <sup>a</sup> | <i>R</i> <sub>1</sub> = 0.0626; <i>wR</i> <sub>2</sub> = 0.1426                                  |                                          | <i>R</i> <sub>1</sub> = 0.0654; <i>wR</i> <sub>2</sub> = 0.1600                                  |
| <i>R</i> indices (all data)                                               | <i>R</i> <sub>1</sub> = 0.0992; <i>wR</i> <sub>2</sub> = 0.1594                                  |                                          | <i>R</i> <sub>1</sub> = 0.0866; <i>wR</i> <sub>2</sub> = 0.1694                                  |
| Largest diff. peak/hole (e Å <sup>-3</sup> )                              | 2.981 / -1.900                                                                                   |                                          | 0878 / -3.134                                                                                    |
| CCDC no.                                                                  |                                                                                                  |                                          |                                                                                                  |

**S5. PHI report for Fe<sub>6</sub>Y<sub>3</sub> 8.**

PHI Report generated on 28/07/2015 at 16:16:13

Job: FeY1

Name:

Input:

```
****ion fe(iii)oh(w)
fe(iii)oh(w)
****gfactors
1 2.0
2 2.0
****exchange
1 2 -10
****fit
simplex
10
ex 1 2 4
-----
1.9 2.0 2.1
gf 1 4 0
gf 2 4 0
-----
****sus
bsus 0.1
****params
opmode fit s
imp 1 0
****end
```

Output:

```
=====
Finished Simplex with          247 iterations
-----
```

-16.504536635286755

EX    1   2   4

-----  
1.9508748984356066

GF    1   4   0

GF    2   4   0

-----  
Residual: 0.04210139550604808

Residual reduced by:    0.53585383680019504E+004

                 or: 99.999214318124984%

=====■

Susceptibility:

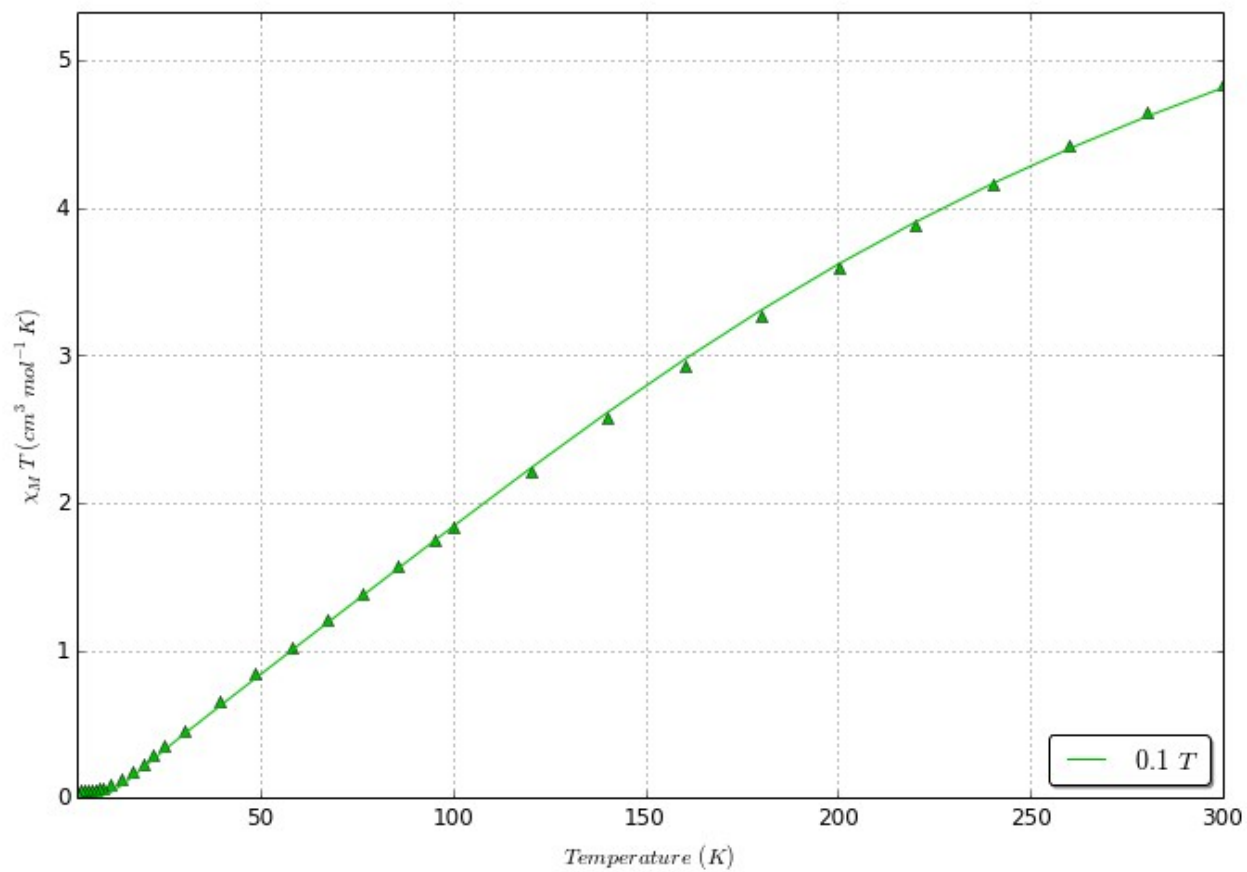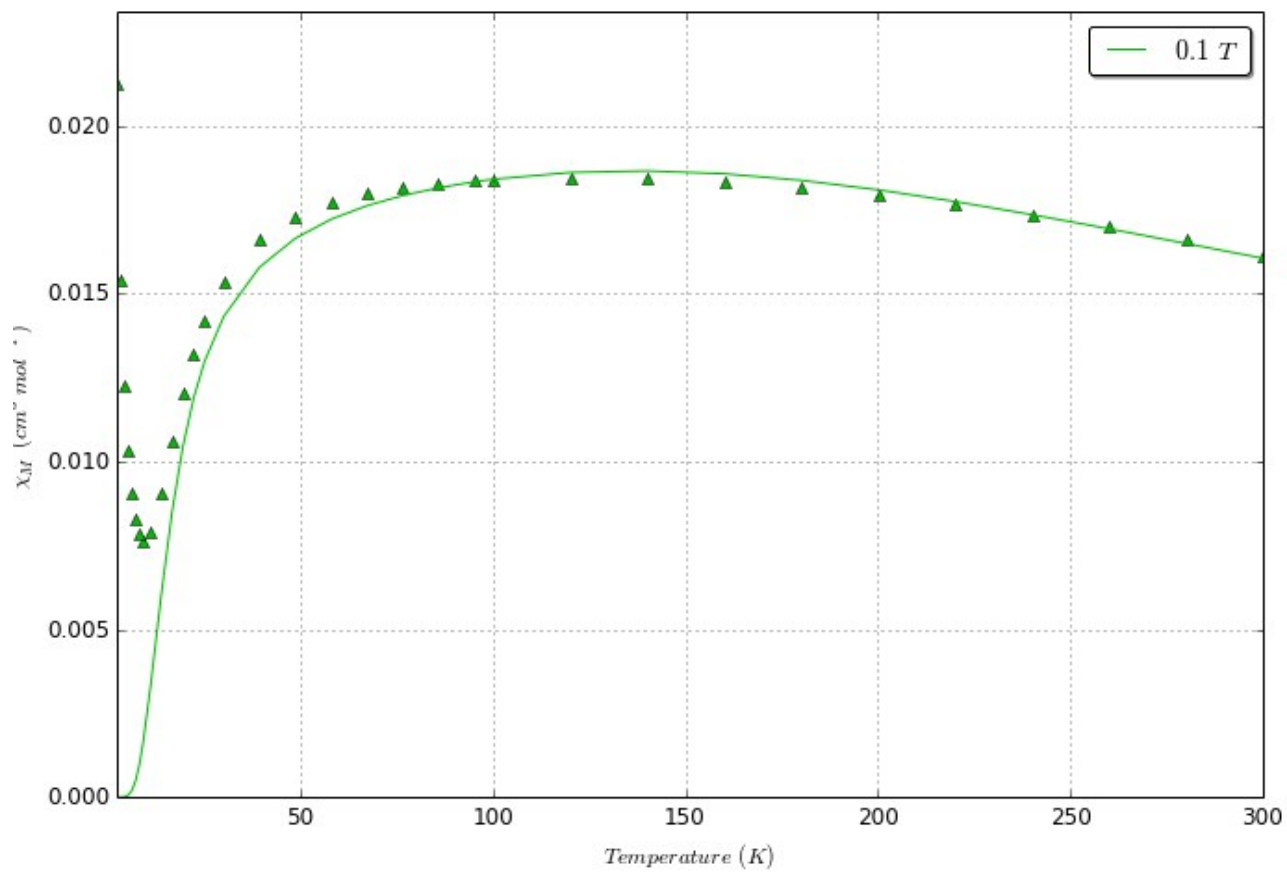

Supplement: c5cc08887a1.pdf [file c5cc08887a1.pdf]
